# Supplementary material for: Analysis of Food Pairing in Regional Cuisines of India
Source: PubMed Central journal article supplement (PMC4592201; doi:10.1371/journal.pone.0139539), 2015-10-02
Supplement: pone.0139539.s001.pdf [file pone.0139539.s001.pdf]

# Supporting Information

S1 Table Distribution of ingredients across categories

| Ingredient Category | Bengali | Gujarati | Jain | Maharashtrian | Mughlai | Punjabi | Rajasthani | South Indian |
|---------------------|---------|----------|------|---------------|---------|---------|------------|--------------|
| spice               | 25      | 23       | 26   | 25            | 24      | 33      | 21         | 25           |
| vegetable           | 14      | 23       | 29   | 14            | 15      | 29      | 16         | 23           |
| fruit               | 13      | 19       | 25   | 9             | 16      | 22      | 5          | 14           |
| plant derivative    | 8       | 7        | 11   | 7             | 8       | 13      | 4          | 6            |
| nut/seed            | 12      | 12       | 12   | 11            | 11      | 13      | 8          | 10           |
| cereal/crop         | 6       | 10       | 11   | 6             | 9       | 12      | 7          | 9            |
| dairy               | 7       | 6        | 8    | 6             | 7       | 10      | 5          | 7            |
| plant               | 2       | 3        | 3    | 3             | 4       | 5       | 4          | 5            |
| pulse               | 4       | 6        | 5    | 4             | 5       | 6       | 5          | 6            |
| herb                | 2       | 2        | 5    | 3             | 3       | 4       | 2          | 3            |
| meat                | 3       | 0        | 0    | 2             | 0       | 1       | 0          | 0            |
| beverage            | 1       | 0        | 1    | 1             | 0       | 1       | 0          | 0            |
| fish/seafood        | 2       | 0        | 0    | 0             | 0       | 0       | 0          | 2            |
| animalproduct       | 2       | 0        | 1    | 1             | 2       | 2       | 0          | 2            |
| flower              | 1       | 1        | 1    | 1             | 1       | 1       | 1          | 1            |
| additive            | 0       | 0        | 0    | 0             | 0       | 0       | 0          | 1            |

Table 1: Number of ingredients in each category for all regional cuisines.
