# Supplementary material for: Analysis of Food Pairing in Regional Cuisines of India
Source: PubMed Central journal article supplement (PMC4592201; doi:10.1371/journal.pone.0139539), 2015-10-02
Supplement: pone.0139539.s002.pdf [file pone.0139539.s002.pdf]

## Supporting Information

S2 Table Exponents ( $\alpha$ ) of Sigmoid fits for  $P(N_s^R)$  vs  $N_s^R$  distribution

| Cuisine       | $\alpha$ Values |          |          |          |          |
|---------------|-----------------|----------|----------|----------|----------|
|               | Original        | R0       | R1       | R2       | R3       |
| Bengali       | 0.255525        | 0.181436 | 0.255149 | 0.190506 | 0.26209  |
| Gujarati      | 0.405862        | 0.187475 | 0.365109 | 0.207978 | 0.37633  |
| Jain          | 0.226656        | 0.155991 | 0.235283 | 0.138507 | 0.228731 |
| Maharashtrian | 0.282265        | 0.158809 | 0.259422 | 0.141178 | 0.269226 |
| Mughlai       | 0.184891        | 0.173672 | 0.202563 | 0.143178 | 0.194965 |
| Punjabi       | 0.207118        | 0.150068 | 0.207771 | 0.120212 | 0.215736 |
| Rajasthani    | 0.315478        | 0.223507 | 0.35912  | 0.209513 | 0.351726 |
| South Indian  | 0.300892        | 0.189509 | 0.280907 | 0.213137 | 0.290387 |

Table 1: Exponents ( $\alpha$ ) for regional cuisines and their random controls.
