# Supplementary material for: Analysis of Food Pairing in Regional Cuisines of India
Source: PubMed Central journal article supplement (PMC4592201; doi:10.1371/journal.pone.0139539), 2015-10-02
Supplement: pone.0139539.s003.pdf [file pone.0139539.s003.pdf]

## Supporting Information

S3 Table Power law exponents ( $\gamma$ ) for  $f(N)$  vs  $N$  distribution

| Cuisine       | $\gamma$ Values |
|---------------|-----------------|
| Bengali       | 1.71906         |
| Gujarati      | 2.11136         |
| Jain          | 1.77156         |
| Maharashtrian | 1.6974          |
| Mughlai       | 1.47354         |
| Punjabi       | 1.55844         |
| Rajasthani    | 2.62489         |
| South Indian  | 1.948           |

Table 1: Power law exponents ( $\gamma$ ) of all regional cuisines.
