# Supplementary material for: Analysis of Food Pairing in Regional Cuisines of India
Source: PubMed Central journal article supplement (PMC4592201; doi:10.1371/journal.pone.0139539), 2015-10-02
Supplement: pone.0139539.s004.pdf [file pone.0139539.s004.pdf]

## Supporting Information

**S4 Table Ingredients contributing significantly to food pairing**

| <b>Bengali</b>                                           |                                |                                |                                                          |                                |                                |
|----------------------------------------------------------|--------------------------------|--------------------------------|----------------------------------------------------------|--------------------------------|--------------------------------|
| <b>Ingredients contributing to negative food pairing</b> | <b><math>\chi</math> value</b> | <b>Frequency of occurrence</b> | <b>Ingredients contributing to positive food pairing</b> | <b><math>\chi</math> value</b> | <b>Frequency of occurrence</b> |
| coriander                                                | -0.24319                       | 40                             | milk                                                     | 0.84165                        | 31                             |
| ginger garlic paste                                      | -0.21437                       | 16                             | cottage cheese                                           | 0.38636                        | 11                             |
| garam masala                                             | -0.20126                       | 14                             | orange                                                   | 0.21789                        | 4                              |
| mango                                                    | -0.19701                       | 13                             | buttermilk                                               | 0.17259                        | 25                             |
| cayenne                                                  | -0.13469                       | 65                             | coconut                                                  | 0.13006                        | 12                             |
| tomato                                                   | -0.11413                       | 14                             | rose                                                     | 0.12178                        | 5                              |
| tamarind                                                 | -0.11053                       | 9                              | cocoa                                                    | 0.08218                        | 5                              |
| green bell pepper                                        | -0.10233                       | 26                             | strawberry                                               | 0.05512                        | 2                              |
| cumin                                                    | -0.06875                       | 36                             | cream                                                    | 0.05368                        | 5                              |
| mung bean                                                | -0.06702                       | 4                              | saffron                                                  | 0.05329                        | 14                             |
| <b>Gujarati</b>                                          |                                |                                |                                                          |                                |                                |
| <b>Ingredients contributing to negative food pairing</b> | <b><math>\chi</math> value</b> | <b>Frequency of occurrence</b> | <b>Ingredients contributing to positive food pairing</b> | <b><math>\chi</math> value</b> | <b>Frequency of occurrence</b> |
| green bell pepper                                        | -0.29066                       | 169                            | cardamom                                                 | 0.17035                        | 43                             |
| cayenne                                                  | -0.19164                       | 145                            | milk                                                     | 0.15800                        | 34                             |
| mung bean                                                | -0.09783                       | 37                             | mango                                                    | 0.15628                        | 20                             |
| coriander                                                | -0.05721                       | 45                             | lemon                                                    | 0.11942                        | 31                             |
| garam masala                                             | -0.05695                       | 26                             | strawberry                                               | 0.07485                        | 2                              |
| black pepper                                             | -0.05281                       | 33                             | chaat masala                                             | 0.06775                        | 4                              |
| asafoetida                                               | -0.04863                       | 169                            | apple                                                    | 0.06058                        | 2                              |
| coriander cumin seeds powder                             | -0.04469                       | 26                             | mint                                                     | 0.05999                        | 11                             |
| sesame seed                                              | -0.04148                       | 62                             | apricot                                                  | 0.05948                        | 1                              |
| turmeric                                                 | -0.03435                       | 157                            | cottage cheese                                           | 0.05743                        | 4                              |
| <b>Jain</b>                                              |                                |                                |                                                          |                                |                                |
| <b>Ingredients contributing to negative food pairing</b> | <b><math>\chi</math> value</b> | <b>Frequency of occurrence</b> | <b>Ingredients contributing to positive food pairing</b> | <b><math>\chi</math> value</b> | <b>Frequency of occurrence</b> |
| cayenne                                                  | -0.18622                       | 152                            | butter                                                   | 1.22722                        | 68                             |
| garam masala                                             | -0.14199                       | 28                             | milk                                                     | 0.85545                        | 62                             |
| mango                                                    | -0.11421                       | 24                             | bread                                                    | 0.26881                        | 25                             |
| black bean                                               | -0.08291                       | 33                             | corn                                                     | 0.26018                        | 29                             |
| coriander                                                | -0.06855                       | 47                             | cocoa                                                    | 0.14714                        | 3                              |
| tamarind                                                 | -0.06793                       | 17                             | cream                                                    | 0.11764                        | 37                             |
| black pepper                                             | -0.06234                       | 55                             | peanut butter                                            | 0.09925                        | 4                              |
| green bell pepper                                        | -0.06095                       | 112                            | grape                                                    | 0.09078                        | 4                              |
| ginger                                                   | -0.06059                       | 17                             | cheese                                                   | 0.08762                        | 11                             |
| chaat masala                                             | -0.05613                       | 14                             | strawberry                                               | 0.08254                        | 4                              |
| <b>Maharashtrian</b>                                     |                                |                                |                                                          |                                |                                |
| <b>Ingredients contributing to negative food pairing</b> | <b><math>\chi</math> value</b> | <b>Frequency of occurrence</b> | <b>Ingredients contributing to positive food pairing</b> | <b><math>\chi</math> value</b> | <b>Frequency of occurrence</b> |
| cayenne                                                  | -0.20961                       | 71                             | strawberry                                               | 0.18767                        | 1                              |
| green bell pepper                                        | -0.16631                       | 27                             | apricot                                                  | 0.17937                        | 1                              |

|              |          |    |             |         |    |
|--------------|----------|----|-------------|---------|----|
| cardamom     | -0.13171 | 28 | milk        | 0.14751 | 11 |
| peanut       | -0.11527 | 10 | butter      | 0.09349 | 3  |
| tamarind     | -0.11284 | 12 | cheese      | 0.08038 | 1  |
| tomato       | -0.10687 | 8  | coconut     | 0.05239 | 22 |
| black bean   | -0.09923 | 6  | sesame seed | 0.04636 | 6  |
| black pepper | -0.09723 | 16 | cream       | 0.04274 | 2  |
| cinnamon     | -0.08889 | 21 | cocoa       | 0.04255 | 1  |
| coriander    | -0.08271 | 30 | rice        | 0.03092 | 11 |

#### Mughlai

| Ingredients contributing to negative food pairing | $\chi$ value | Frequency of occurrence | Ingredients contributing to positive food pairing | $\chi$ value | Frequency of occurrence |
|---------------------------------------------------|--------------|-------------------------|---------------------------------------------------|--------------|-------------------------|
| ginger                                            | -0.22264     | 20                      | milk                                              | 0.95554      | 71                      |
| garam masala                                      | -0.22203     | 38                      | rice                                              | 0.46744      | 9                       |
| clove                                             | -0.1727      | 42                      | bread                                             | 0.16189      | 12                      |
| cinnamon                                          | -0.15605     | 33                      | grape                                             | 0.16132      | 3                       |
| tomato                                            | -0.13042     | 21                      | mango                                             | 0.14838      | 11                      |
| ginger garlic paste                               | -0.10488     | 22                      | lemon                                             | 0.14672      | 8                       |
| green bell pepper                                 | -0.10483     | 33                      | chaat masala                                      | 0.13532      | 13                      |
| cayenne                                           | -0.09472     | 70                      | honey                                             | 0.12645      | 3                       |
| coriander                                         | -0.07582     | 38                      | cream                                             | 0.10899      | 38                      |
| onion                                             | -0.0696      | 29                      | soybean                                           | 0.08769      | 4                       |

#### Punjabi

| Ingredients contributing to negative food pairing | $\chi$ value | Frequency of occurrence | Ingredients contributing to positive food pairing | $\chi$ value | Frequency of occurrence |
|---------------------------------------------------|--------------|-------------------------|---------------------------------------------------|--------------|-------------------------|
| garam masala                                      | -0.18891     | 251                     | milk                                              | 0.16846      | 137                     |
| green bell pepper                                 | -0.14559     | 301                     | bread                                             | 0.12552      | 60                      |
| cayenne                                           | -0.1208      | 496                     | butter                                            | 0.10934      | 87                      |
| tomato                                            | -0.10311     | 137                     | cheese                                            | 0.09834      | 7                       |
| mango                                             | -0.10147     | 120                     | corn                                              | 0.05484      | 34                      |
| ginger garlic paste                               | -0.09551     | 110                     | lemon                                             | 0.0488       | 80                      |
| ginger                                            | -0.08621     | 82                      | cottage cheese                                    | 0.03844      | 128                     |
| coriander                                         | -0.08364     | 243                     | grape                                             | 0.03832      | 4                       |
| cinnamon                                          | -0.06514     | 84                      | honey                                             | 0.03591      | 11                      |
| clove                                             | -0.05827     | 86                      | olive                                             | 0.03388      | 16                      |

#### Rajasthani

| Ingredients contributing to negative food pairing | $\chi$ value | Frequency of occurrence | Ingredients contributing to positive food pairing | $\chi$ value | Frequency of occurrence |
|---------------------------------------------------|--------------|-------------------------|---------------------------------------------------|--------------|-------------------------|
| garam masala                                      | -0.13817     | 15                      | ginger                                            | 0.21659      | 3                       |
| coriander                                         | -0.0901      | 35                      | mango                                             | 0.15163      | 21                      |
| clove                                             | -0.07852     | 16                      | milk                                              | 0.14564      | 21                      |
| cumin                                             | -0.07138     | 55                      | corn                                              | 0.09148      | 2                       |
| cinnamon                                          | -0.05325     | 9                       | tamarind                                          | 0.07795      | 4                       |
| coriander cumin seeds powder                      | -0.04782     | 4                       | cardamom                                          | 0.03735      | 31                      |
| asafoetida                                        | -0.03663     | 40                      | butter                                            | 0.03672      | 2                       |
| cayenne                                           | -0.03646     | 80                      | lemon                                             | 0.02806      | 3                       |
| potato                                            | -0.03488     | 3                       | bread                                             | 0.02767      | 2                       |
| black pepper                                      | -0.03262     | 9                       | green bell pepper                                 | 0.02621      | 33                      |

#### South Indian

| Ingredients contributing to negative food pairing | $\chi$ value | Frequency of occurrence | Ingredients contributing to positive food pairing | $\chi$ value | Frequency of occurrence |
|---------------------------------------------------|--------------|-------------------------|---------------------------------------------------|--------------|-------------------------|
| tamarind                                          | -0.13638     | 87                      | rice                                              | 0.43068      | 119                     |
| tomato                                            | -0.11714     | 51                      | garam masala                                      | 0.25363      | 24                      |
| green bell pepper                                 | -0.11087     | 144                     | butter                                            | 0.19469      | 16                      |
| cayenne                                           | -0.09829     | 238                     | black bean                                        | 0.1833       | 150                     |
| coriander                                         | -0.06636     | 73                      | coconut                                           | 0.17749      | 68                      |
| curry leaf                                        | -0.05268     | 196                     | mung bean                                         | 0.13281      | 34                      |
| peanut                                            | -0.05027     | 16                      | milk                                              | 0.13233      | 26                      |
| ginger                                            | -0.04228     | 24                      | cardamom                                          | 0.06319      | 46                      |
| lemon                                             | -0.03363     | 20                      | soybean                                           | 0.04396      | 8                       |
| cumin                                             | -0.03177     | 135                     | onion                                             | 0.0302       | 72                      |

**Table 1:** Details of top 10 ingredients contributing to positive and negative food pairing in each of the regional cuisines.
